# Supplementary material for: LC-MS/MS-Based Profiling of Tryptophan-Related Metabolites in Healthy Plant Foods
Source: MDPI journal article supplement (doi:10.3390/molecules25020311), 2020-01-13
Supplement: s1 [file s1]

# LC-MS/MS-Based Profiling of Tryptophan-Related Metabolites in Healthy Plant Foods

## Supplementary Material

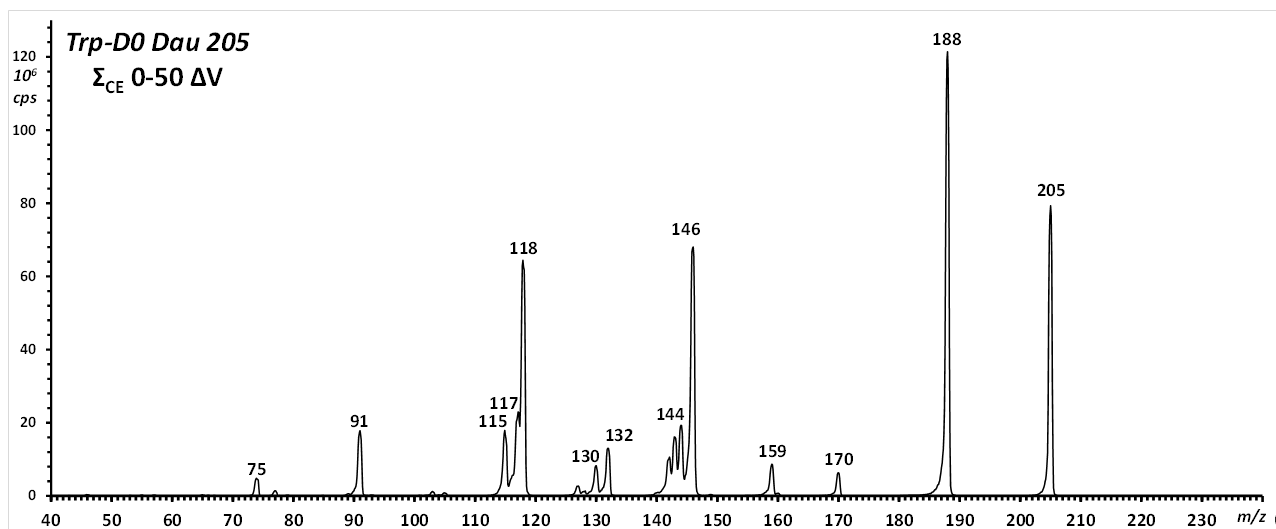

Figure S1. Integrated spectra MS/MS of Tryptophan.

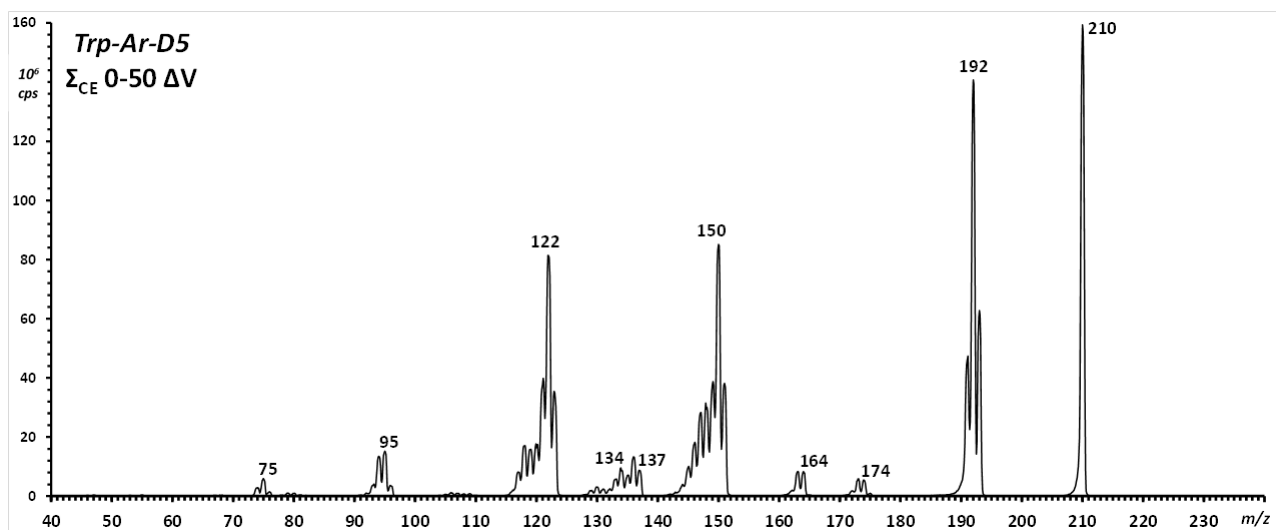

Figure S2. Integrated spectra MS/MS of Tryptophan D5.

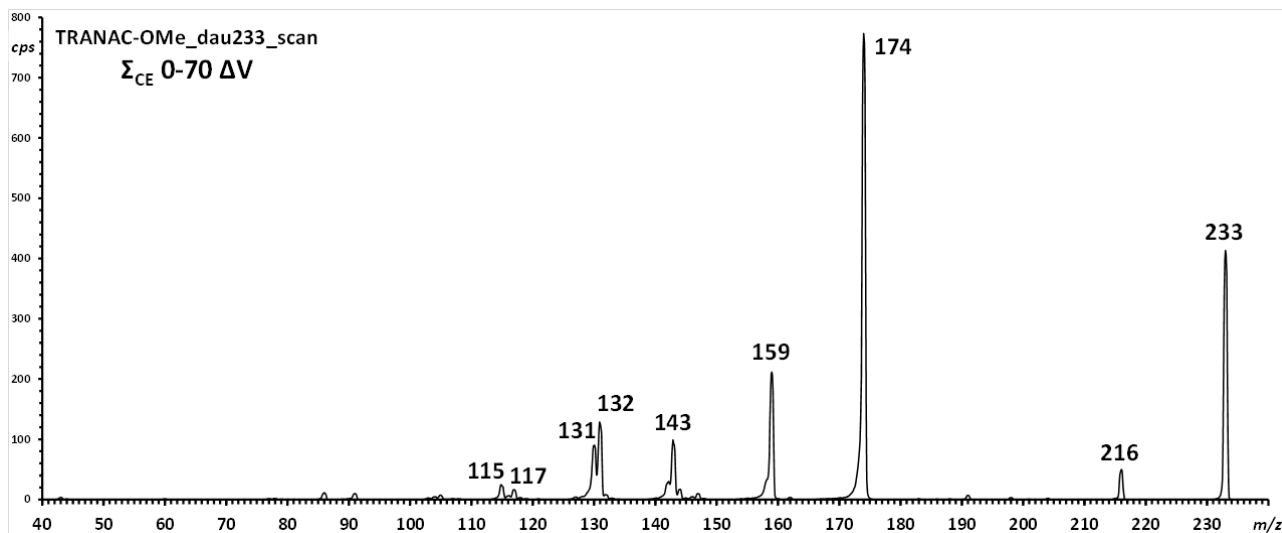

Figure S3. Integrated spectra MS/MS of Melatonin.

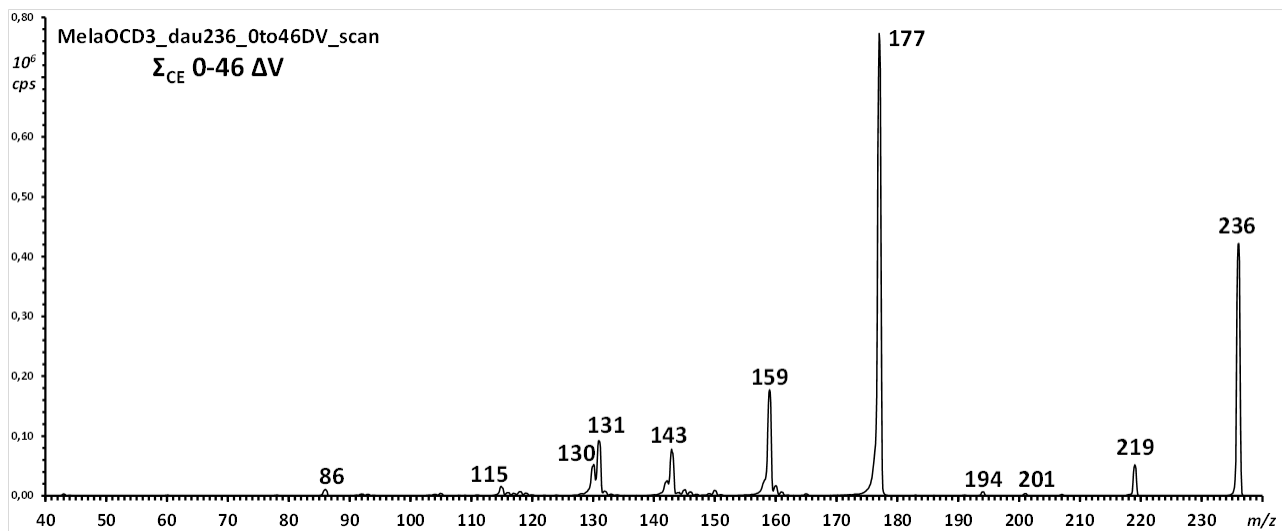

Figure S4. Integrated spectra MS/MS of Melatonin OCD3.

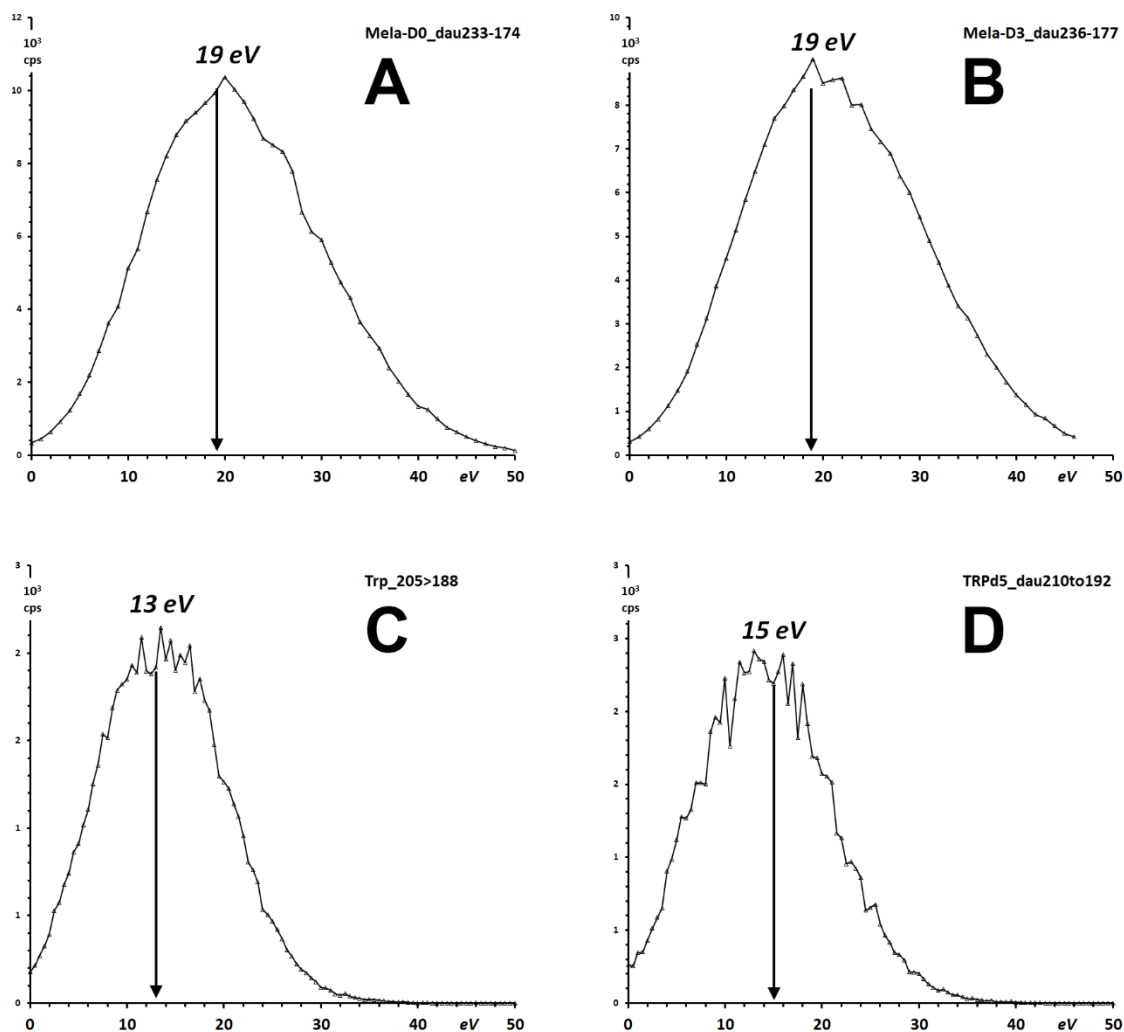

**Figure S5.** Operational surrogate of the "breakdown curve" of (A) Melatonin  $m/z$  233 > 174, (B) Melatonin OCD3  $m/z$  236 > 177, (C) Tryptophan  $m/z$  205 > 188 and (D) Tryptophan D5  $m/z$  210 > 192. They were adapted to the specific task to obtain the collision energy corresponding to the maximum yield of the selected fragment ion.

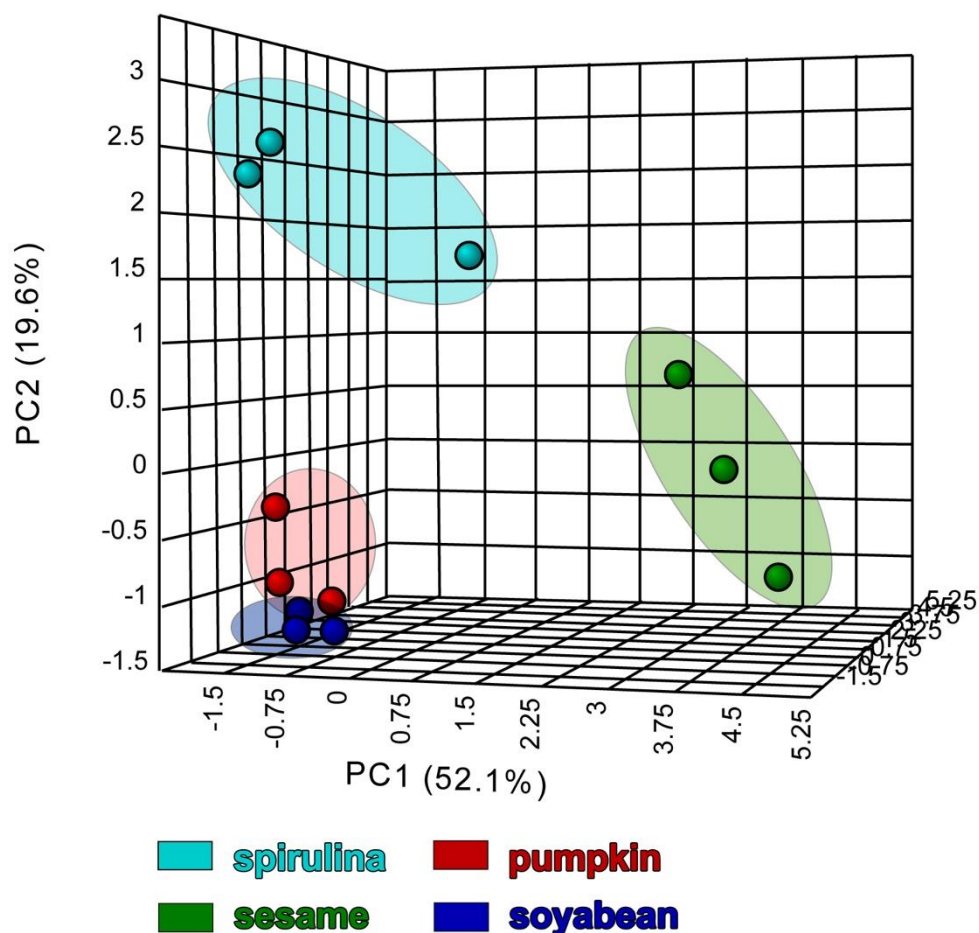

**Figure S6.** PCA plot with an explained variance of 52.1% and 19.6% on principal component 1 and 2, respectively. Data represents the indolome composition of different plant materials using the same water-based extraction protocol.

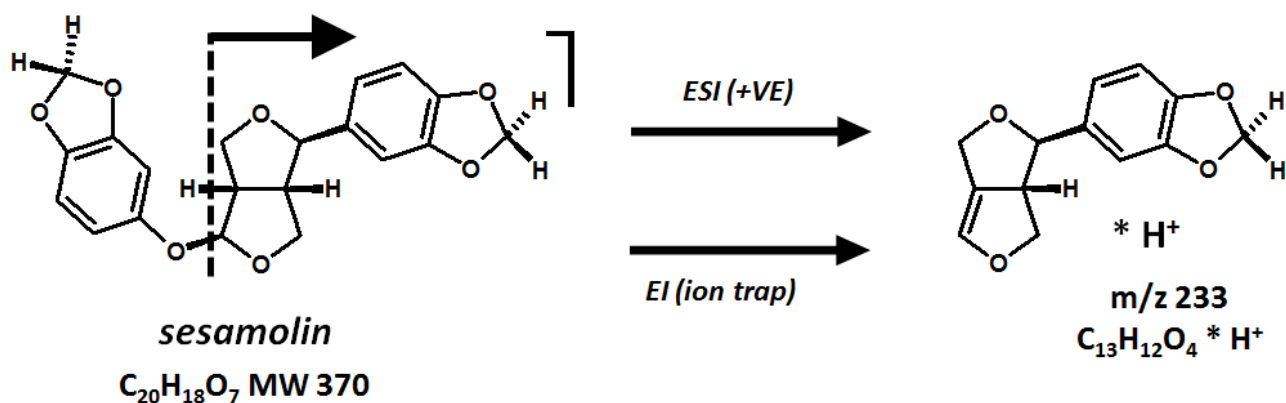

**Figure S7.** Possible mechanism underlying the formation of the  $m/z$  233 fragment from in-source decomposition of the protonated parent ion  $m/z$  371 of sesamol. This fragment can originate from low critical energy elimination processes para- to a methylenedioxy aromatic system further bearing an aryl-alkyl ether, and yielding a 1,2,4-trioxo-benzene neutral fragment. This decomposition can occur through a charge-remote 1,2- or 1,6- rearrangement of a protonated or ionized precursor. .
